# Supplementary material for: Current treatment standard for patella fractures in Germany
Source: Unfallchirurg. 2020 Dec 17;124(10):832–8. [Article in German] doi: 10.1007/s00113-020-00939-8 (PMC8460507; doi:10.1007/s00113-020-00939-8)
Supplement: Supplementary file 1 [file 113_2020_939_MOESM1_ESM.pdf]

## Fragebogen Behandlungsalgorithmus bei Patellafrakturen

1.) Welcher Versorgungskategorie gehören Sie an?

- a) Lokales Traumazentrum
- b) Regionales Traumazentrum
- c) Überregionales Traumazentrum
- d) Wir sind keinem Netzwerk angeschlossen

2.) In welchen Ausbildungsstand befinden Sie sich?

- a) Weiterbildung zum Facharzt für Orthopädie und Unfallchirurgie
- b) Weiterbildung zur Zusatzbezeichnung spezielle Unfallchirurgie
- c) Weiterbildung zur Zusatzbezeichnung spezielle orthopädische Chirurgie
- d) Erworbene Zusatzbezeichnung spezielle Unfallchirurgie
- e) Erworbene Zusatzbezeichnung spezielle orthopädische Chirurgie

3.) Über wieviel operative Berufserfahrung verfügen Sie (seit Erreichen des FA O/U oder FA C mit Schwerpunkt Unfallchirurgie)?

- a) <5 Jahre
- b) 5-10 Jahre
- c) >10 Jahre

4.) Wie viele Patellafrakturen versorgen Sie persönlich pro Jahr?

- a)  $\leq 5$
- b) 6-15
- c) 16-25
- d) 26-39
- e)  $\geq 40$

5.) Wie viele Patellafrakturen versorgen Sie in ihrem Krankenhaus pro Jahr?

- a)  $\leq 5$
- b) 6-15
- c) 16-25
- d) 26-39
- e)  $\geq 40$

6.) Welche bildgebende Diagnostik führen Sie als Standard präoperativ durch? (Mehrfachnennung möglich)

- a) Konventionelles Röntgenbild in 2 Ebenen
- b) Konventionelles Röntgenbild in 2 Ebenen und Patella axial
- c) Computertomographie (CT)
- d) Magnetresonanztomographie (MRT)
- e) Digitale Volumentomographie (DVT) oder CT

7.) Bis zu welchem Dislokationsgrad führen Sie eine konservative Therapie einer Patella-Längsfraktur ohne relevante Komorbiditäten durch (intakte Retinakula)?

- a) Nie
- b) 2mm
- c) 5mm
- d) 10mm
- e) >10mm

8.) Wie behandeln Sie wenig dislozierte, stabile (BV-Kontrolle) Patellafrakturen (inkl. multifragmentärer Frakturmuster) ohne relevante Komorbiditäten (intakte Retinakula)?

- a) Immer operativ
- b) Stabil bis 30° Flexion: konservativ (jüngerer Patient)
- c) Stabil bis 60° Flexion: konservativ (jüngerer Patient)
- d) Stabil bis 30° Flexion: konservativ (älterer Patient)
- e) Stabil bis 60° Flexion: konservativ (älterer Patient)
- f) In Abhängigkeit vom Knorpelschaden (MRT-Befund)
- g) Individuell

9.) Was ist Ihre zeitliche Vorgabe bis zur operativen Versorgung einer isolierten Patellafraktur ohne limitierenden Weichteilschaden und ohne Mehrfachverletzung?

- a) am Unfalltag
- b) innerhalb von 48 h
- c) innerhalb 1 Woche<sup>[1-3]</sup><sub>SEP</sub>
- d) nach mehr als 1 Woche

10.) Wie versorgen Sie bevorzugt einfache Querfrakturen der Patella?

- a) Klassische Zuggurtung
- b) Klassische Zuggurtung mit zusätzlicher Cerclage (z.B. Tonnencerclage)
- c) Schraubenosteosynthese (Großfragment)
- d) Schraubenosteosynthese (Kleinfragment)
- e) Kanülierte Schraubenosteosynthese mit Cerclage
- f) Winkelstabile Platte
- g) Winkelstabile Platte mit Cerclage (z.B. Draht oder Fiber Tape)
- h) Winkelstabile Platte mit Cerclage und zusätzlicher Schraube

11.) Wie versorgen Sie bevorzugt mehrfragmentierte Frakturen der Patella?

- a) Klassische Zuggurtung
- b) Klassische Zuggurtung mit zusätzlicher Cerclage (z.B. Tonnencerclage)
- c) Klassische Zuggurtung mit zusätzlicher Schraubenosteosynthese
- d) Schraubenosteosynthese
- e) Kanülierte Schraubenosteosynthese mit Cerclage
- f) Winkelstabile Platte
- g) Winkelstabile Platte mit Cerclage (z.B. Draht oder Fiber Tape)
- h) Winkelstabile Platte mit Cerclage und zusätzlicher Schraube

12.) Wie versorgen Sie Patellafrakturen mit inferiorer Polbeteiligung

- a) Klassische Zuggurtung
- b) Plattenosteosynthese mit Haltenähten an die Platte
- c) Plattenosteosynthese mit „Krallen“ für den distalen Pol
- d) McLaughlin-Schlinge zusätzlich zur Osteosynthese
- e) Materialkombination aus Schrauben, Drähten und Cerclage
- f) Sonstige
- g) der inferioren Polfraktur messe ich keine besondere Bedeutung bei

13.) Wie erfolgt die intraoperative Repositionskontrolle (Mehrfachnennung möglich)?

- a) Palpatorisch
- b) Konventionell-radiologisch (Durchleuchtung)
- c) Schichtbildgebung (3D-Fluoroskopie)
- d) Arthroskopisch
- e) Visuelle Kontrolle ohne vollständige Exposition der Gelenkfläche
- f) Eversion der Patella und vollständige Exposition der Gelenkfläche

14.) Welchen Zugang wählen Sie zur Gelenkarthrotomie?

- a) Keine Arthrotomie
- b) Medial
- c) Lateral
- d) Abhängig von Zerreißung der Retinakula

15.) Wie geben Sie die postoperative Belastbarkeit vor?

- a) Entlastung
- b) Teilbelastung (z.B. 20 kg)
- c) Vollbelastung in einer Streckorthese (z.B. Mecronschiene)
- d) Vollbelastung

16.) Wie geben Sie die postoperative Beweglichkeit vor?

- a) Frei
- b) Limitiert
- c) Stufenschema: z.B. 2 Wochen Mecronschiene, 2 Wochen 0-0-60°, 2 Wochen 0-0-90°

17.) Welche Bildgebung führen Sie postoperativ bei einfachen Frakturen durch?

- a) Konventionelles Röntgenbild in 2 Ebenen
- b) Konventionelles Röntgenbild in 2 Ebenen und Patella axial
- c) Computertomographie (CT)
- d) Magnetresonanztomographie (MRT)
- e) Digitale Volumentomographie (DVT)

18.) Welche Bildgebung führen Sie postoperativ bei komplexen Frakturen durch?

- a) Konventionelles Röntgenbild in 2 Ebenen
- b) Konventionelles Röntgenbild in 2 Ebenen und Patella axial
- c) Computertomographie (CT)
- d) Magnetresonanztomographie (MRT)
- e) Digitale Volumentomographie (DVT)

19.) Wann führen Sie standardmäßig die weitere postoperative bildgebende Kontrolle nach Zuggurtung durch?

- a) 2 Wochen
- b) 4 Wochen
- c) 6 Wochen
- d) mache keine Zuggurtung

20.) Wann führen Sie standardmäßig die weitere postoperative bildgebende Kontrolle nach kanülierter Schraubenosteosynthese mit Cerclage durch?

- a) 2 Wochen
- b) 4 Wochen
- c) 6 Wochen
- d) mache keine kanülierte Schraubenosteosynthese mit Cerclage

21.) Wann führen Sie standardmäßig die weitere postoperative bildgebende Kontrolle nach Plattenosteosynthese durch?

- a) 2 Wochen
- b) 4 Wochen
- c) 6 Wochen
- d) mache keine Plattenosteosynthese an der Patella

20.) Röntgen Sie nach Zuggurtungsosteosynthesen der Patella postoperativ häufiger im Vergleich zu anderen Verfahren?

- a) ja
- b) nein
- c) mache keine Zuggurtungsosteosynthese

21.) Sind Sie mit Ihren Resultaten zufrieden?

- a) Ja, uneingeschränkt.
- b) Ja, weitestgehend.
- c) Nein.

22.) Welche Komplikationen sehen Sie häufig? Oder: Was sind Ihrer Meinung nach die drängendsten Probleme nach operativer Versorgung einer Patellafraktur (Mehrfachnennung möglich)

- a) Infekt
- b) Sekundärer Repositionsverlust
- c) Sekundärer Ausriß distaler Pol
- d) Pseudarthrosen
- e) Implantatdislokation
- f) Bewegungseinschränkung
- g) Patella baja
